# Supplementary material
Source: PubMed Central journal article supplement (PMC6168433)

# Adjusted Odds Ratios and 95% Confidence Intervals for Rasburicase Exposure Males compared to Females

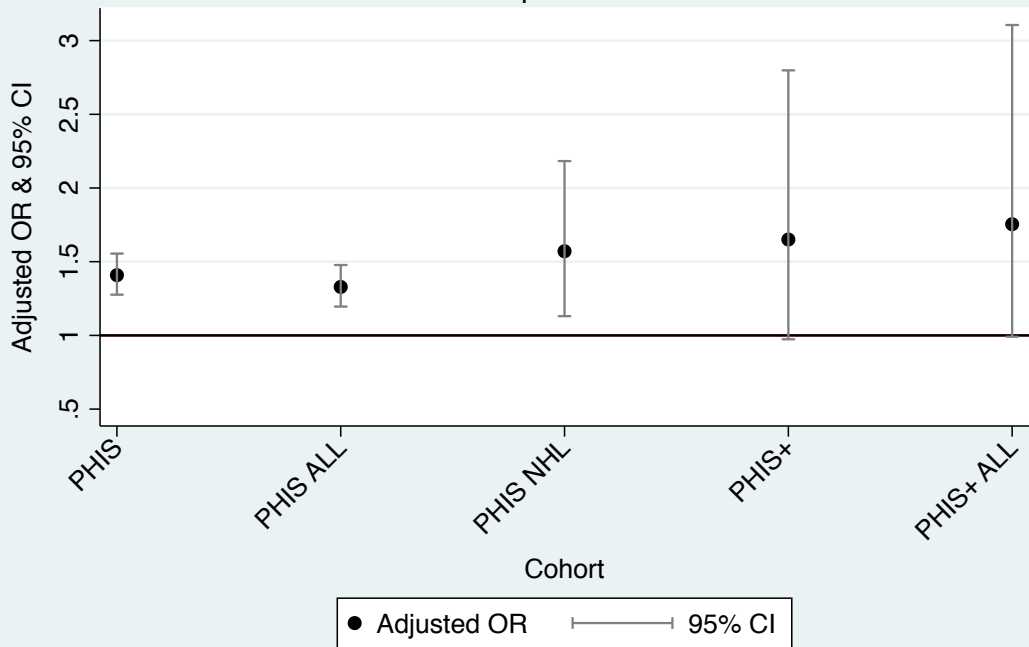

Supplement: NIHMS938235-supplement-Supp_FigS1.pdf [file NIHMS938235-supplement-Supp_FigS1.pdf]
